# Supplementary material for: Preferential and Increased Uptake of Hydroxyl-Terminated PAMAM Dendrimers by Activated Microglia in Rabbit Brain Mixed Glial Culture
Source: MDPI journal article supplement (doi:10.3390/molecules23051025), 2018-04-27
Supplement: s1 [file s1]

## Supplementary Section

### Preferential and increased uptake of hydroxyl terminated PAMAM dendrimers by activated microglia in rabbit brain mixed glial culture

Yossef Alnasser <sup>† 1,4</sup>, Siva P. Kambhampati <sup>† 2</sup>, Elizabeth Nance <sup>1,5</sup>, Labchan Rajbhandari <sup>3</sup>, Shiva Shrestha <sup>3</sup>, Arun Venkatesan <sup>3</sup>, Rangaramanujam M Kannan <sup>\* 2</sup>,  
Sujatha Kannan <sup>\* 1,2</sup>.

<sup>1</sup>Department of Anesthesiology and Critical Care Medicine, Johns Hopkins University School of Medicine, Baltimore, MD

<sup>2</sup>Center for Nanomedicine, Wilmer Eye Institute, Department of Ophthalmology, Johns Hopkins, University School of Medicine, Baltimore, MD

<sup>3</sup>Department of Neurology, Johns Hopkins University School of Medicine, Baltimore, MD, USA

<sup>4</sup>Current Address: Department of Pediatrics, BC Children's Hospital, University of British Columbia, Vancouver, BC, Canada.

<sup>5</sup>Current Address: Department of Chemical Engineering, University of Washington, Seattle, WA, USA.

*† Co-first authors with equal contribution to this work*

*\*Corresponding authors:*

**Sujatha Kannan**, Department of Anesthesiology and Critical Care Medicine, Johns Hopkins University, Baltimore, MD-21205, USA.

Tel.: +1 410 955 7610; email: [skannan3@jhmi.edu](mailto:skannan3@jhmi.edu)

**Rangaramanujam M. Kannan**, Department of Ophthalmology, Center for Nanomedicine at the Wilmer Eye Institute, 400 North Broadway, Baltimore, Maryland 21231, USA

Tel.: +1 443-287-8634; e-mail: [krangar1@jhmi.edu](mailto:krangar1@jhmi.edu).

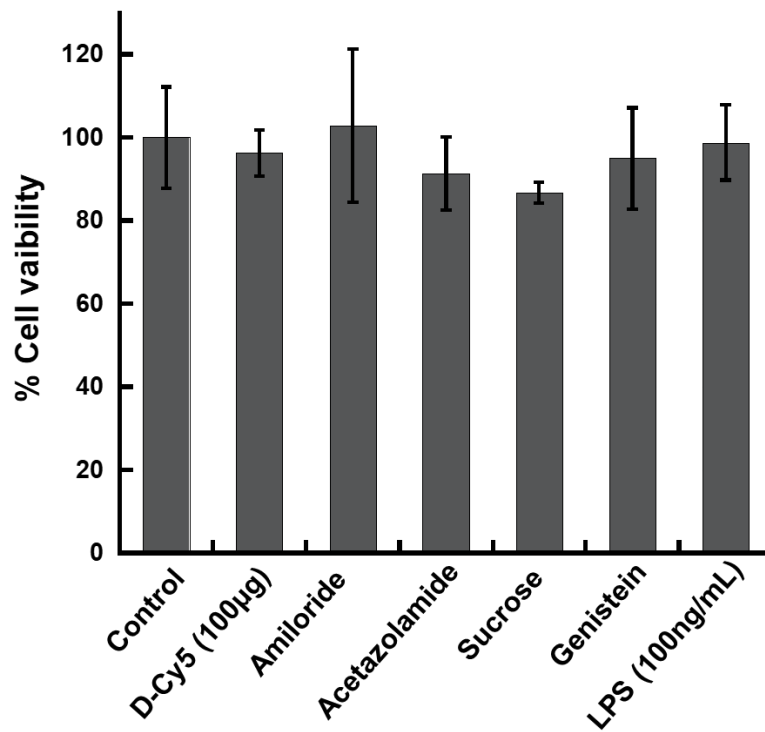

**Figure S1: Cell toxicity profile various inhibitors in primary mixed glia culture.** The various treatments D-Cy5 (100 µg/mL), Amiloride (10µM) to prevent macropinocytosis, Acetazolamide (100 nM) obstruct aquaporin channels, Sucrose (450 nM) to impede fluid phase endocytosis, Genistein (100 nM) to block caveolae-mediated endocytosis, and LPS (100 ng/mL) to activate the cells were evaluated for cytotoxicity. Three hours treatment with aforementioned treatments did not demonstrate significant cytotoxicity (>85%).
